# Supplementary material for: Short Stature is Associated with Increased Risk of Dyslipidemia in Korean Adolescents and Adults
Source: PubMed Central journal article supplement (PMC6773853; doi:10.1038/s41598-019-50524-2), 2019-10-01
Supplement: 41598_2019_50524_MOESM1_ESM.pdf [file 41598_2019_50524_MOESM1_ESM.pdf]

# Supplementary Information

## Short Stature is Associated with Increased Risk of Dyslipidemia in Korean Adolescents and Adults

Na-Kyung Oh<sup>1</sup>, Yun-Mi Song<sup>2</sup>, Shin-Hye Kim<sup>1,\*</sup>, Mi Jung Park<sup>1,\*</sup>

<sup>1</sup>Department of Pediatrics, Inje University Sanggye Paik Hospital, Seoul, Korea.

<sup>2</sup>Department of Family Medicine, Samsung Medical Center, Sungkyunkwan University School of Medicine, Seoul, Korea.

**Supplementary Table S1. General characteristics of the subjects**

|                               | Adolescents (N=5207) |                   |         | Adults (N=32682) |                    |         |
|-------------------------------|----------------------|-------------------|---------|------------------|--------------------|---------|
|                               | Boys<br>(N=2776)     | Girls<br>(N=2431) | P-value | Men<br>(N=13644) | Women<br>(N=19038) | P-value |
| <b>Age</b>                    | 15.1±0.1             | 15.1±0.1          | 0.931   | 38.9±0.1         | 39.3±0.1           | 0.002   |
| <b>Height (cm)</b>            | 169.3±0.2            | 159.8±0.1         | <0.001  | 172.0±0.1        | 158.9±0.1          | <0.001  |
| <b>WC (cm)</b>                | 73.4±0.2             | 68.8±0.2          | <0.001  | 84.0±0.1         | 76.4±0.1           | <0.001  |
| <b>BMI (kg/m<sup>2</sup>)</b> | 21.5±0.1             | 20.9±0.1          | <0.001  | 24.2±0.1         | 22.9±0.1           | <0.001  |
| <b>Alcohol consumption</b>    |                      |                   | <0.001  |                  |                    | <0.001  |
| No                            | 2396 (83.4%)         | 2198 (88.7%)      |         | 2888 (21.7%)     | 9891 (51.1%)       |         |
| Occasionally                  | 318 (14.9%)          | 189 (10.0%)       |         | 7246 (55.2%)     | 7755 (43.0%)       |         |
| Excessively                   | 37 (1.7%)            | 23 (1.3%)         |         | 3100 (23.1%)     | 1026 (6.0%)        |         |
| <b>Physical activity</b>      |                      |                   | <0.001  |                  |                    | <0.001  |
| No                            | 1617 (58.2%)         | 1637 (66.8%)      |         | 8917 (67.0%)     | 13556 (72.6%)      |         |
| Yes                           | 1126 (41.8%)         | 766 (33.2%)       |         | 4180 (33.0%)     | 4961 (27.4%)       |         |
| <b>Household income</b>       |                      |                   | 0.263   |                  |                    | 0.006   |
| Quartile 1                    | 319 (13.0%)          | 298 (14.2%)       |         | 1105 (8.7%)      | 1650 (9.0%)        |         |
| Quartile 2                    | 646 (26.5%)          | 613 (26.9%)       |         | 3162 (24.4%)     | 4730 (26.0%)       |         |
| Quartile 3                    | 872 (29.9%)          | 765 (31.1%)       |         | 4387 (32.8%)     | 6023 (32.1%)       |         |
| Quartile 4                    | 903 (30.6%)          | 723 (27.9%)       |         | 4813 (34.2%)     | 6406 (33.0%)       |         |

The data were present as mean±SE or number (%).

BMI, body mass index; WC, waist circumference

**Supplementary Table S2. Prevalence of adverse lipid profile according to the height percentile**

|                       | Height percentile |              |              |              |             | P-for-trend |
|-----------------------|-------------------|--------------|--------------|--------------|-------------|-------------|
|                       | <10th             | 10-29th      | 30-69th      | 70-89th      | ≥90th       |             |
| Adolescents (N=5,207) |                   |              |              |              |             |             |
| No.                   | 503               | 1044         | 2078         | 1055         | 527         |             |
| TC ≥200 mg/dL         | 43 (8.8%)         | 78 (7.2%)    | 123 (6.1%)   | 61 (5.1%)    | 27 (5.3%)   | 0.006       |
| LDL-C ≥130 mg/dL      | 33 (6.8%)         | 64 (6.1%)    | 110 (5.3%)   | 52 (4.6%)    | 21 (3.5%)   | 0.028       |
| HDL-C <40 mg/dL       | 49 (9.6%)         | 144 (13.2%)  | 286 (13.1%)  | 184 (18.8%)  | 96 (18.7%)  | <0.001      |
| TG ≥130 mg/dL         | 60 (12.7%)        | 130 (12.4%)  | 251 (12.0%)  | 137 (13.9%)  | 65 (12.9%)  | 0.708       |
| Dyslipidemia          | 130 (27.0%)       | 289 (27.2%)  | 537 (25.3%)  | 310 (30.0%)  | 161 (31.7%) | 0.057       |
| Adults (N=32,682)     |                   |              |              |              |             |             |
| No.                   | 3307              | 6432         | 13079        | 6580         | 3284        |             |
| TC ≥240 mg/dL         | 369 (9.8%)        | 569 (8.4%)   | 911 (6.5%)   | 352 (5.3%)   | 136 (3.8%)  | <0.001      |
| LDL-C ≥160 mg/dL      | 349 (9.3%)        | 583 (8.4%)   | 649 (7.0%)   | 346 (5.2%)   | 168 (4.7%)  | <0.001      |
| HDL-C <40 mg/dL       | 650 (20.1%)       | 1216 (19.5%) | 2257 (17.6%) | 1060 (16.0%) | 663 (20.0%) | 0.002       |
| TG ≥200 mg/dL         | 534 (16.7%)       | 938 (15.6%)  | 1599 (12.8%) | 711 (11.3%)  | 438 (13.5%) | <0.001      |
| Dyslipidemia          | 1346 (39.8%)      | 2318 (35.9%) | 4062 (31.0%) | 1757 (26.7%) | 983 (29.6%) | <0.001      |

The Data were presented in number (%).

HDL-C, high density lipoprotein-cholesterol; LDL-C, low density lipoprotein-cholesterol; TC, total cholesterol; TG, triglycerides

**Supplementary Table S3. Sex and age-specific mean and specified percentile values (cm) of height in participants**

|                    | Mean  | Height percentile |               |               |               |
|--------------------|-------|-------------------|---------------|---------------|---------------|
|                    |       | 10 percentile     | 30 percentile | 70 percentile | 90 percentile |
| <b>Adolescents</b> |       |                   |               |               |               |
| <b>Boys</b>        |       |                   |               |               |               |
| 12 yr              | 157.1 | 145.8             | 152.1         | 161.5         | 167.4         |
| 13 yr              | 163.5 | 153.7             | 161.0         | 167.8         | 172.8         |
| 14 yr              | 168.9 | 161.2             | 166.1         | 172.1         | 176.6         |
| 15 yr              | 172.2 | 165.4             | 169.3         | 174.9         | 179.0         |
| 16 yr              | 173.1 | 166.3             | 169.9         | 176.2         | 181.4         |
| 17 yr              | 174.0 | 166.9             | 170.8         | 177.4         | 182.2         |
| 18 yr              | 174.2 | 167.8             | 171.1         | 177.0         | 181.7         |
| <b>Girls</b>       |       |                   |               |               |               |
| 12 yr              | 155.7 | 147.5             | 153.2         | 158.9         | 163.5         |
| 13 yr              | 158.2 | 151.9             | 155.6         | 161.1         | 165.5         |
| 14 yr              | 159.8 | 153.5             | 157.1         | 162.3         | 167.0         |
| 15 yr              | 160.9 | 154.2             | 158.3         | 163.8         | 167.4         |
| 16 yr              | 160.8 | 154.8             | 157.9         | 163.4         | 167.5         |
| 17 yr              | 161.6 | 154.6             | 158.4         | 164.5         | 168.3         |
| 18 yr              | 160.9 | 153.2             | 158.7         | 164.5         | 168.2         |
| <b>Adults</b>      |       |                   |               |               |               |
| <b>Male</b>        |       |                   |               |               |               |
| <30s               | 174.5 | 167.2             | 171.6         | 177.6         | 181.8         |
| 30s                | 173.4 | 166.0             | 170.4         | 176.3         | 180.9         |
| 40s                | 171.0 | 163.9             | 168.0         | 173.7         | 178.4         |
| 50s                | 168.5 | 161.2             | 165.6         | 171.6         | 175.7         |
| <b>Female</b>      |       |                   |               |               |               |
| <30s               | 161.5 | 154.4             | 158.7         | 164.3         | 168.5         |
| 30s                | 160.1 | 153.4             | 157.4         | 162.9         | 167.0         |
| 40s                | 158.2 | 151.5             | 155.4         | 160.8         | 164.9         |
| 50s                | 155.9 | 149.2             | 153.2         | 158.6         | 162.7         |
